# Supplementary material for: The Concentration of Opioid Prescriptions by Providers and Among Patients in the Oregon Medicaid Program
Source: Atypon-hosted journal article supplement (doi:10.1176/appi.ps.201500116), 2016-01-14
Supplement: appi.ps.201500116.ds001.pdf [file appi.ps.201500116.ds001.pdf]

Morphine equivalents conversion table <sup>a</sup>

| <b>Opioid</b>                                 | <b>Morphine Equivalents Conversion Factor</b> |
|-----------------------------------------------|-----------------------------------------------|
| Codeine                                       | 0.15                                          |
| Hydrocodone                                   | 1                                             |
| Hydromorphone                                 | 4                                             |
| Meperidine                                    | 0.1                                           |
| Methadone                                     | 3                                             |
| Morphine                                      | 1                                             |
| Opium <sup>b</sup>                            | 1                                             |
| Oxycodone                                     | 1.5                                           |
| Oxymorphone                                   | 3                                             |
| Fentanyl transdermal (in mcg/hr) <sup>c</sup> | 7.2                                           |
| Tapentadol                                    | 1                                             |

Notes: <sup>a</sup> Source: Logan et al. (2008) <sup>b</sup> For conversion factor for opium, we used Opioid Dosage Calculator Washington State Agency Medical Directors Group available at <http://agencymeddirectors.wa.gov/mobile.html> <sup>c</sup> Fentanyl Transdermal conversion to morphine equivalents is based on the assumption that one patch remains in place for three days.

ICD-9 codes for health conditions associated with opioid use

| <b>Diagnosis</b>         | <b>ICD-9-CM codes</b>                                                                                                                                                                                                                                                                         |
|--------------------------|-----------------------------------------------------------------------------------------------------------------------------------------------------------------------------------------------------------------------------------------------------------------------------------------------|
| Cancer                   | 140-239, 239.XX, 338.3                                                                                                                                                                                                                                                                        |
| Arthritis/joint pain     | 710-720 & 725-740                                                                                                                                                                                                                                                                             |
| Back pain                | 721.3X–721.9X, 722.2X, 722.30, 722.70, 722.80, 722.90, 722.32, 722.72, 722.82, 722.92, 722.33, 722.73, 722.83, 722.93, 724.XX, 737.1, 737.3, 738.4, 738.5, 739.2, 739.3, 739.4, 756.10, 756.11, 756.12, 756.13, 756.19, 805.4, 805.8, 839.2, 839.42, 846, 846.0, 847.1, 847.3, 847.2, & 847.9 |
| Neck pain                | 721.0X, 721.1X, 722.0X, 722.31, 722.71, 722.81, 722.91, 723.XX, 839.0, 839.1, & 847.0                                                                                                                                                                                                         |
| Headache/migraine        | 346-347 & 307.81                                                                                                                                                                                                                                                                              |
| Fracture                 | 800-829, 905.0-905.5, V13.51, V13.52, V54.0-V54.29, V66.4, & V67.4                                                                                                                                                                                                                            |
| Visceral pain            | 550.0X, 550.1X, 551.0X, 551.1X, 551.2X, 552.0X, 552.1, 552.2X, 560.81, 562.01, 562.03, 562.11, 562.13, 567.2, 567.21, 567.22, 567.31, 567.38, 567.8, 567.82, 567.89, 567.9, 569.5, 574.X, 575.0, 575.1X, 577.0, 577.1, 592.X, 594.X, 596.0, 788.0, 789.0, 789.02, & 789.6X                    |
| Wound/injury             | 860-904.9 & 910-959.9                                                                                                                                                                                                                                                                         |
| Neuropathy               | 053.13, 072.72, 337.0, 337.1, 353-357, 377.33, 377.34, & 377.41                                                                                                                                                                                                                               |
| Reproductive system pain | 614-617, 625.X, 626.3, & 626.5                                                                                                                                                                                                                                                                |
| Other pain               | 730.X, 733.0X, & 780.56                                                                                                                                                                                                                                                                       |
| Depression               | 296.20, 296.21, 296.22, 296.23, 296.24, 296.25, 296.30, 296.31, 296.32, 296.33, 296.34, 296.35, 298.0, & 311X                                                                                                                                                                                 |
| Bipolar                  | 296.0, 296.0X, 296.1, 296.1X, 296.4, 296.4X, 296.5, 296.5X, 296.6, 296.6X, 296.7                                                                                                                                                                                                              |
| Schizophrenia            | 295.X                                                                                                                                                                                                                                                                                         |
| Alcohol problem          | 291.0, 291.3, 291.4, 291.81, 303.0, 305.0, 291.1, 291.2, 291.5, 291.8, 291.82, 291.89, 291.9, 292.0, 292.1, 292.2, 292.81, 303.9, & 305.2-305.7                                                                                                                                               |
| Drug problem             | 292.0, 292.1, 292.2, 292.81, 305.2-305.7, 292.82-292.89, 292.9, & 304                                                                                                                                                                                                                         |

Notes: The listed pain diagnosis codes are related to non-cancer pain conditions

## Full regression results

|                               | Doctor shopping<br>(N=61,477) | Pharmacy shopping<br>(N=61,477) | Opioid prescription overlap<br>(N=61,477) | Opioid/benzodiazepine overlap<br>(N=61,477) |
|-------------------------------|-------------------------------|---------------------------------|-------------------------------------------|---------------------------------------------|
| <b>Age Group</b>              |                               |                                 |                                           |                                             |
| 18-39                         | -0.0010<br>(0.0015)           | -0.0000<br>(0.0003)             | -0.0031***<br>(0.0012)                    | -0.0071***<br>(0.0015)                      |
| 40-59                         | -0.0347***<br>(0.0024)        | -0.0025***<br>(0.0005)          | -0.0036<br>(0.0021)                       | 0.0056**<br>(0.0026)                        |
| 60-79                         | -0.0584***<br>(0.0039)        | -0.0036***<br>(0.0008)          | -0.0133**<br>(0.0053)                     | -0.0111<br>(0.0063)                         |
| 80+                           | -0.0342***<br>(0.0113)        | -0.0016<br>(0.0012)             | -0.0244***<br>(0.0073)                    | -0.0295***<br>(0.0096)                      |
| Male                          | -0.0009<br>(0.0015)           | 0.0004<br>(0.0004)              | -0.0013<br>(0.0019)                       | -0.0246***<br>(0.0022)                      |
| <b>Rurality of residence</b>  |                               |                                 |                                           |                                             |
| Small rural town              | 0.0057<br>(0.0092)            | 0.0001<br>(0.0007)              | -0.0006<br>(0.0107)                       | -0.0094<br>(0.0149)                         |
| Large rural town              | 0.0068<br>(0.0080)            | 0.0007<br>(0.0006)              | -0.0041<br>(0.0088)                       | -0.0193<br>(0.0136)                         |
| Urban                         | 0.0125<br>(0.0083)            | 0.0008<br>(0.0006)              | -0.0027<br>(0.0090)                       | -0.0263<br>(0.0138)                         |
| <b>Pain-related diagnosis</b> |                               |                                 |                                           |                                             |
| Back pain                     | 0.0156***<br>(0.0018)         | 0.0005<br>(0.0004)              | 0.0061***<br>(0.0020)                     | 0.0074***<br>(0.0023)                       |
| Neck pain                     | 0.0223***<br>(0.0032)         | 0.0025***<br>(0.0008)           | -0.0015<br>(0.0031)                       | 0.0097***<br>(0.0036)                       |
| Arthritis/joint pain          | 0.0018<br>(0.0014)            | 0.0002<br>(0.0003)              | 0.0021<br>(0.0016)                        | -0.0056***<br>(0.0021)                      |
| Headache/migraine             | 0.0178***<br>(0.0033)         | 0.0001<br>(0.0008)              | 0.0075**<br>(0.0033)                      | 0.0127***<br>(0.0041)                       |
| Fractures                     | 0.0258***<br>(0.0037)         | 0.0023**<br>(0.0010)            | -0.0008<br>(0.0035)                       | -0.0039<br>(0.0039)                         |
| Visceral pain                 | 0.0400***<br>(0.0039)         | 0.0027***<br>(0.0009)           | -0.0029<br>(0.0030)                       | -0.0072<br>(0.0037)                         |
| Wound/injury                  | 0.0321***<br>(0.0022)         | 0.0017***<br>(0.0004)           | 0.0014<br>(0.0018)                        | 0.0004<br>(0.0022)                          |
| Neuropathy                    | 0.0036<br>(0.0039)            | -0.0007<br>(0.0009)             | 0.0128***<br>(0.0046)                     | -0.0083<br>(0.0048)                         |
| Reproductive system pain      | 0.0180***<br>(0.0027)         | 0.0017**<br>(0.0006)            | -0.0023<br>(0.0022)                       | -0.0074***<br>(0.0027)                      |
| Other pain                    | 0.0072<br>(0.0088)            | 0.0003<br>(0.0022)              | 0.0109<br>(0.0114)                        | 0.0263**<br>(0.0129)                        |
| <b>Other diagnosis</b>        |                               |                                 |                                           |                                             |
| Depression                    | 0.0161***<br>(0.0028)         | 0.0004<br>(0.0006)              | 0.0058**<br>(0.0027)                      | 0.0081**<br>(0.0035)                        |

|                 |                     |                     |                      |                       |
|-----------------|---------------------|---------------------|----------------------|-----------------------|
| Bipolar         | 0.0106<br>(0.0067)  | 0.0019<br>(0.0018)  | 0.0137**<br>(0.0064) | 0.0403***<br>(0.0087) |
| Schizophrenia   | -0.0053<br>(0.0172) | -0.0071<br>(0.0065) | -0.0187<br>(0.0165)  | 0.0645***<br>(0.0218) |
| Alcohol problem | 0.0227<br>(0.0132)  | 0.0028<br>(0.0022)  | -0.0044<br>(0.0108)  | -0.0126<br>(0.0142)   |
| Drug problem    | -0.0034<br>(0.0134) | -0.0005<br>(0.0023) | 0.0024<br>(0.0111)   | 0.0196<br>(0.0143)    |
| R-squared       | 0.13                | 0.013               | 0.17                 | 0.19                  |

Robust standard errors in parentheses.

\*\*\* p<0.01, \*\* p<0.05

Regression results used for Figure 2

|                                          | Opioid<br>prescription<br>overlap<br>(N=49,765) | Opioid/<br>benzodiazepine<br>overlap<br>(N=49,765) |
|------------------------------------------|-------------------------------------------------|----------------------------------------------------|
| Decile 2                                 | -0.0001<br>(0.0006)                             | -0.0024**<br>(0.0011)                              |
| Decile 3                                 | 0.0013**<br>(0.0006)                            | -0.0032***<br>(0.0011)                             |
| Decile 4                                 | 0.0013<br>(0.0008)                              | 0.0009<br>(0.0017)                                 |
| Decile 5                                 | 0.0032***<br>(0.0011)                           | 0.0014<br>(0.0020)                                 |
| Decile 6                                 | 0.0014<br>(0.0013)                              | 0.0052**<br>(0.0025)                               |
| Decile 7                                 | 0.0014<br>(0.0016)                              | 0.0107***<br>(0.0033)                              |
| Decile 8                                 | 0.0193***<br>(0.0033)                           | 0.0475***<br>(0.0052)                              |
| Decile 9                                 | 0.1097***<br>(0.0079)                           | 0.1274***<br>(0.0086)                              |
| Decile 10                                | 0.2131***<br>(0.0148)                           | 0.2455***<br>(0.0159)                              |
| Interaction with<br>high-volume provider |                                                 |                                                    |
| × Decile 2                               | 0.0002<br>(0.0019)                              | -0.0029<br>(0.0074)                                |
| × Decile 3                               | -0.0034<br>(0.0023)                             | 0.0063<br>(0.0078)                                 |
| × Decile 4                               | -0.0032<br>(0.0023)                             | 0.0137<br>(0.0094)                                 |
| × Decile 5                               | -0.0051**<br>(0.0022)                           | 0.0181<br>(0.0095)                                 |
| × Decile 6                               | -0.0026<br>(0.0024)                             | 0.0289**<br>(0.0117)                               |
| × Decile 7                               | 0.0058<br>(0.0045)                              | 0.0250**<br>(0.0099)                               |
| × Decile 8                               | 0.0226***<br>(0.0071)                           | 0.0526***<br>(0.0111)                              |
| × Decile 9                               | 0.0448***<br>(0.0115)                           | 0.0339***<br>(0.0125)                              |
| × Decile 10                              | 0.0371**<br>(0.0170)                            | 0.0462**<br>(0.0180)                               |
| R-squared                                | 0.17                                            | 0.20                                               |

Robust standard errors in parentheses

\*\*\* p<0.01, \*\* p<0.05

### Regression results with alternative definition of high-volume prescribers

|                                          | Opioid<br>prescription<br>overlap<br>(N=49,765) | Opioid/<br>benzodiazepine<br>overlap<br>(N=49,765) |
|------------------------------------------|-------------------------------------------------|----------------------------------------------------|
| Decile 2                                 | -0.0001<br>(0.0006)                             | -0.0024**<br>(0.0011)                              |
| Decile 3                                 | 0.0011<br>(0.0006)                              | -0.0025**<br>(0.0012)                              |
| Decile 4                                 | 0.0011<br>(0.0007)                              | 0.0022<br>(0.0017)                                 |
| Decile 5                                 | 0.0029***<br>(0.0010)                           | 0.0032<br>(0.0020)                                 |
| Decile 6                                 | 0.0013<br>(0.0012)                              | 0.0081***<br>(0.0026)                              |
| Decile 7                                 | 0.0022<br>(0.0016)                              | 0.0125***<br>(0.0031)                              |
| Decile 8                                 | 0.0239***<br>(0.0034)                           | 0.0537***<br>(0.0049)                              |
| Decile 9                                 | 0.1237***<br>(0.0070)                           | 0.1293***<br>(0.0070)                              |
| Decile 10                                | 0.2219***<br>(0.0115)                           | 0.2441***<br>(0.0122)                              |
| Interaction with<br>high-volume provider |                                                 |                                                    |
| × Decile 2                               | -0.0018<br>(0.0034)                             | -0.0115<br>(0.0206)                                |
| × Decile 3                               | -0.0029<br>(0.0029)                             | -0.0110<br>(0.0166)                                |
| × Decile 4                               | -0.0012<br>(0.0025)                             | 0.0053<br>(0.0184)                                 |
| × Decile 5                               | -0.0031<br>(0.0037)                             | 0.0114<br>(0.0197)                                 |
| × Decile 6                               | -0.0010<br>(0.0028)                             | 0.0292<br>(0.0230)                                 |
| × Decile 7                               | 0.0077<br>(0.0062)                              | 0.0317<br>(0.0183)                                 |
| × Decile 8                               | 0.0214***<br>(0.0080)                           | 0.0605***<br>(0.0186)                              |
| × Decile 9                               | 0.0360***<br>(0.0124)                           | 0.0413**<br>(0.0186)                               |
| × Decile 10                              | 0.0329**<br>(0.0148)                            | 0.0530***<br>(0.0194)                              |
| R-squared                                | 0.17                                            | 0.20                                               |

Robust standard errors in parentheses

\*\*\* p<0.01, \*\* p<0.05



Regression results with alternative assignment rules applied

|                                     | Assignment Rule 1 <sup>a</sup>         |                                          | Assignment Rule 2 <sup>b</sup>         |                                          | Assignment Rule 3 <sup>c</sup>         |                                          |
|-------------------------------------|----------------------------------------|------------------------------------------|----------------------------------------|------------------------------------------|----------------------------------------|------------------------------------------|
|                                     | Opioid prescription overlap (N=50,380) | Opioid/benzodiazepine overlap (N=50,380) | Opioid prescription overlap (N=47,675) | Opioid/benzodiazepine overlap (N=47,675) | Opioid prescription overlap (N=40,309) | Opioid/benzodiazepine overlap (N=40,309) |
| Decile 2                            | -0.0001<br>(0.0006)                    | -0.0023**<br>(0.0011)                    | -0.0001<br>(0.0006)                    | -0.0023**<br>(0.0011)                    | -0.0000<br>(0.0006)                    | -0.0024**<br>(0.0010)                    |
| Decile 3                            | 0.0013**<br>(0.0006)                   | -0.0032***<br>(0.0011)                   | 0.0013**<br>(0.0006)                   | -0.0030***<br>(0.0011)                   | 0.0012**<br>(0.0006)                   | -0.0026**<br>(0.0011)                    |
| Decile 4                            | 0.0013<br>(0.0007)                     | 0.0009<br>(0.0017)                       | 0.0012<br>(0.0007)                     | 0.0011<br>(0.0017)                       | 0.0008<br>(0.0007)                     | 0.0013<br>(0.0017)                       |
| Decile 5                            | 0.0032***<br>(0.0011)                  | 0.0014<br>(0.0020)                       | 0.0031***<br>(0.0011)                  | 0.0018<br>(0.0020)                       | 0.0030***<br>(0.0011)                  | 0.0028<br>(0.0021)                       |
| Decile 6                            | 0.0015<br>(0.0013)                     | 0.0053**<br>(0.0025)                     | 0.0014<br>(0.0013)                     | 0.0060**<br>(0.0025)                     | 0.0018<br>(0.0014)                     | 0.0065**<br>(0.0029)                     |
| Decile 7                            | 0.0013<br>(0.0016)                     | 0.0104***<br>(0.0032)                    | 0.0023<br>(0.0017)                     | 0.0144***<br>(0.0035)                    | 0.0038<br>(0.0021)                     | 0.0203***<br>(0.0048)                    |
| Decile 8                            | 0.0172***<br>(0.0032)                  | 0.0445***<br>(0.0050)                    | 0.0242***<br>(0.0038)                  | 0.0540***<br>(0.0059)                    | 0.0329***<br>(0.0057)                  | 0.0708***<br>(0.0086)                    |
| Decile 9                            | 0.1043***<br>(0.0075)                  | 0.1237***<br>(0.0083)                    | 0.1130***<br>(0.0086)                  | 0.1299***<br>(0.0092)                    | 0.1174***<br>(0.0112)                  | 0.1337***<br>(0.0123)                    |
| Decile 10                           | 0.2116***<br>(0.0145)                  | 0.2458***<br>(0.0156)                    | 0.2048***<br>(0.0158)                  | 0.2459***<br>(0.0171)                    | 0.1951***<br>(0.0194)                  | 0.2585***<br>(0.0219)                    |
| Interaction w/ high-volume provider |                                        |                                          |                                        |                                          |                                        |                                          |
| × Decile 2                          | 0.0003<br>(0.0019)                     | -0.0031<br>(0.0074)                      | -0.0000<br>(0.0019)                    | -0.0023<br>(0.0073)                      | 0.0004<br>(0.0018)                     | -0.0018<br>(0.0071)                      |
| × Decile 3                          | -0.0034                                | 0.0064                                   | -0.0037*                               | 0.0067                                   | -0.0030                                | 0.0076                                   |



|             |           |           |           |           |           |           |
|-------------|-----------|-----------|-----------|-----------|-----------|-----------|
|             | (0.0023)  | (0.0078)  | (0.0022)  | (0.0078)  | (0.0019)  | (0.0075)  |
| × Decile 4  | -0.0032   | 0.0138    | -0.0032   | 0.0142    | -0.0018   | 0.0152    |
|             | (0.0023)  | (0.0094)  | (0.0022)  | (0.0094)  | (0.0019)  | (0.0091)  |
| × Decile 5  | -0.0050** | 0.0181    | -0.0054** | 0.0184    | -0.0043** | 0.0200**  |
|             | (0.0022)  | (0.0095)  | (0.0022)  | (0.0095)  | (0.0022)  | (0.0099)  |
| × Decile 6  | -0.0027   | 0.0291**  | -0.0028   | 0.0292**  | -0.0019   | 0.0384*** |
|             | (0.0024)  | (0.0117)  | (0.0023)  | (0.0118)  | (0.0024)  | (0.0136)  |
| × Decile 7  | 0.0059    | 0.0251**  | 0.0061    | 0.0260**  | 0.0068    | 0.0374*** |
|             | (0.0045)  | (0.0098)  | (0.0047)  | (0.0104)  | (0.0055)  | (0.0125)  |
| × Decile 8  | 0.0235*** | 0.0539*** | 0.0184**  | 0.0523*** | 0.0176    | 0.0588*** |
|             | (0.0069)  | (0.0108)  | (0.0075)  | (0.0119)  | (0.0101)  | (0.0146)  |
| × Decile 9  | 0.0488*** | 0.0381*** | 0.0402*** | 0.0303**  | 0.0355**  | 0.0358**  |
|             | (0.0112)  | (0.0122)  | (0.0122)  | (0.0130)  | (0.0145)  | (0.0157)  |
| × Decile 10 | 0.0401**  | 0.0458*** | 0.0413**  | 0.0478**  | 0.0436**  | 0.0413*   |
|             | (0.0168)  | (0.0177)  | (0.0179)  | (0.0192)  | (0.0216)  | (0.0237)  |
| R-squared   | 0.17      | 0.20      | 0.17      | 0.20      | 0.18      | 0.22      |

Robust standard errors in parentheses

\*\*\* p<0.01, \*\* p<0.05

<sup>a</sup> Assignment rule 1: assign a provider who prescribed opioid the most times

<sup>b</sup> Assignment rule2: assign a provider who prescribed opioid the most times and accounted for at least half of each patient's total number of prescription

<sup>c</sup> Assignment rule3: assign a provider who prescribed opioid the most times and accounted for at least 75% of each patient's total number of prescription
